# Supplementary material for: Asperphenyltones A and B: New Phenylfuropyridinone Skeleton from an Endophytic Aspergillus sp. GXNU-A1
Source: MDPI journal article supplement (doi:10.3390/molecules27238160), 2022-11-23
Supplement: s1 [file s1]

## SUPPLEMENTARY MATERIAL

### Asperphenyltones A and B: Enantiomers with the Phenylfuropyridinone derivatives from an Endophytic *Aspergillus* sp.

#### GXNU-A1

Jiguo Huang <sup>1,†</sup>, Xianglong Bo <sup>2,†</sup>, Furong Wu <sup>2</sup>, Meijing Tan <sup>2</sup>, Youquan Wei <sup>2</sup>, Lixia Wang <sup>1</sup>,  
Junqiang Zhou <sup>1</sup>, Guiming Wu <sup>1</sup> and Xishan Huang <sup>2,\*</sup>

<sup>1</sup> School of Chemical Engineering and Technology, Guangdong Industry Polytechnic, Guangdong Engineering Technical Research Center for Green Household Chemicals, Guangzhou, China

<sup>2</sup> State Key Laboratory for Chemistry and Molecular Engineering of Medicinal Resources, College of Chemistry and Pharmaceutical Sciences, Guangxi Normal University, Guilin, China;

\* Correspondence: huangxishan13@foxmail.com; Tel.: +86-773-2120958

† These authors contributed equally to this work.

**ABSTRACT:** Purification of an extract from the mangrove endophytic fungus *Aspergillus* sp. GXNU-A1 resulted in the isolation of a new pair of enantiomers, asperphenyltones A and B ( $\pm$ 1), together with four known metabolites **2-5**. The structures of asperphenyltones A and B were established by HR-ESI-MS, 1D and 2D NMR data, and further confirmed by single-crystal X-ray diffraction analysis. Compounds **1-5** were evaluated for their anti-inflammatory effects on production of the nitric oxide (NO), and **1**, **3**, and **4** showed weak inhibitory activities against NO production in activated macrophages with IC<sub>50</sub> values ranging from 26.14 to 40.06  $\mu$ M, respectively.

**KEYWORDS:** *Aspergillus* sp.; mangrove endophytic fungus; asperphenyltone A; anti-inflammatory effects

## List of supporting information

**Figure S1.**  $^1\text{H}$  NMR (400 MHz,  $\text{DMSO-}d_6$ ) spectrum of compound **1**

**Figure S2.**  $^{13}\text{C}$  NMR (100 MHz,  $\text{DMSO-}d_6$ ) spectrum of compound **1**

**Figure S3.** Heteronuclear Multiple Quantum Coherence (HMQC) ( $\text{DMSO-}d_6$ ) spectrum of compound **1**

**Figure S4.**  $^1\text{H-}^1\text{H}$  COSY (400 MHz,  $\text{DMSO-}d_6$ ) spectrum of compound **1**

**Figure S5.** Distortionless Enhanced Polarization Transfer (DEPT) ( $\text{DMSO-}d_6$ ) spectrum of compound **1**

**Figure S6.** HMBC ( $\text{DMSO-}d_6$ ) spectrum of compound **1**

**Figure S7.** HR-ESI-MS spectrum of compound **1**

**Figure S8.** UV spectrum of compound **1**

**Figure S9.** IR spectrum of compound **1**

**Figure S10.**  $^1\text{H}$  NMR (400 MHz,  $\text{DMSO-}d_6$ ) spectrum of compound **2**

**Figure S11.**  $^{13}\text{C}$  NMR (100 MHz,  $\text{DMSO-}d_6$ ) spectrum of compound **2**

**Figure S12.**  $^1\text{H}$  NMR (400 MHz,  $\text{DMSO-}d_6$ ) spectrum of compound **3**

**Figure S13.**  $^{13}\text{C}$  NMR (100 MHz,  $\text{DMSO-}d_6$ ) spectrum of compound **3**

**Figure S14.**  $^1\text{H}$  NMR (100 MHz,  $\text{methanol-}d_4$ ) spectrum of compound **4**

**Figure S15.**  $^{13}\text{C}$  NMR (100 MHz,  $\text{methanol-}d_4$ ) spectrum of compound **4**

**Figure S16.**  $^1\text{H}$  NMR (100 MHz,  $\text{methanol-}d_4$ ) spectrum of compound **5**

**Figure S17.**  $^{13}\text{C}$  NMR (100 MHz,  $\text{methanol-}d_4$ ) spectrum of compound **5**

**Table S1–6.** Crystal data for compound **1**.

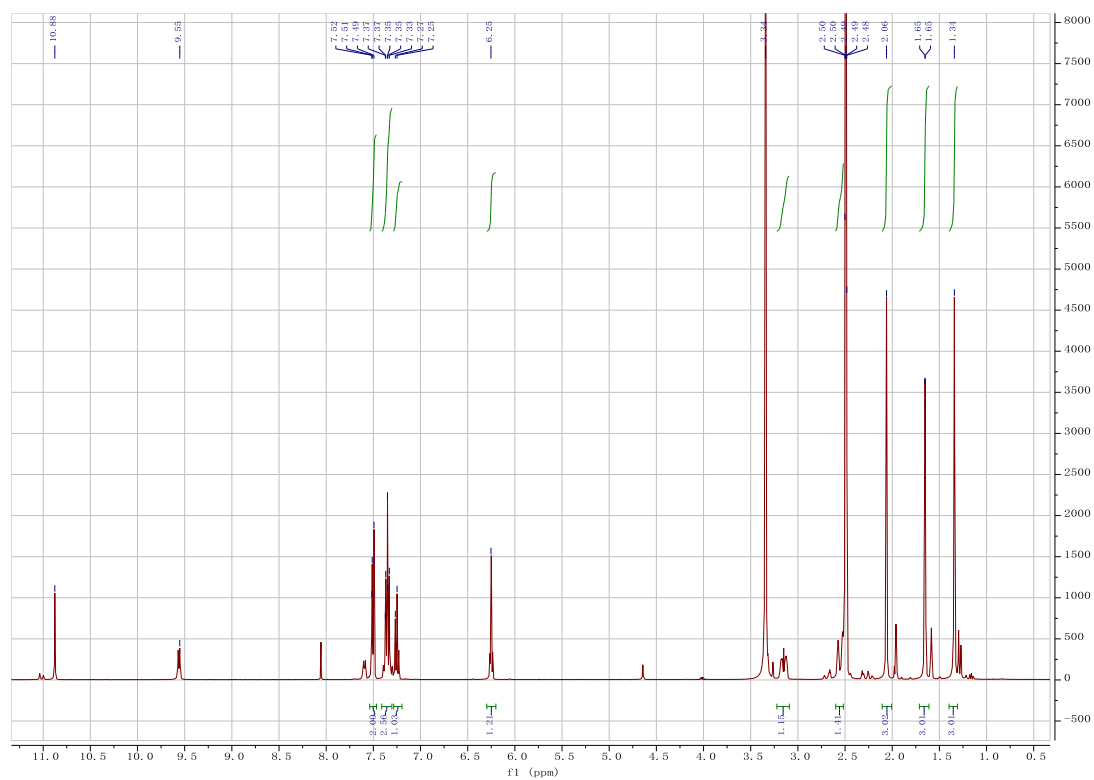

**Figure S1.** <sup>1</sup>H NMR (400 MHz, DMSO-*d*<sub>6</sub>) spectrum of compound **1**

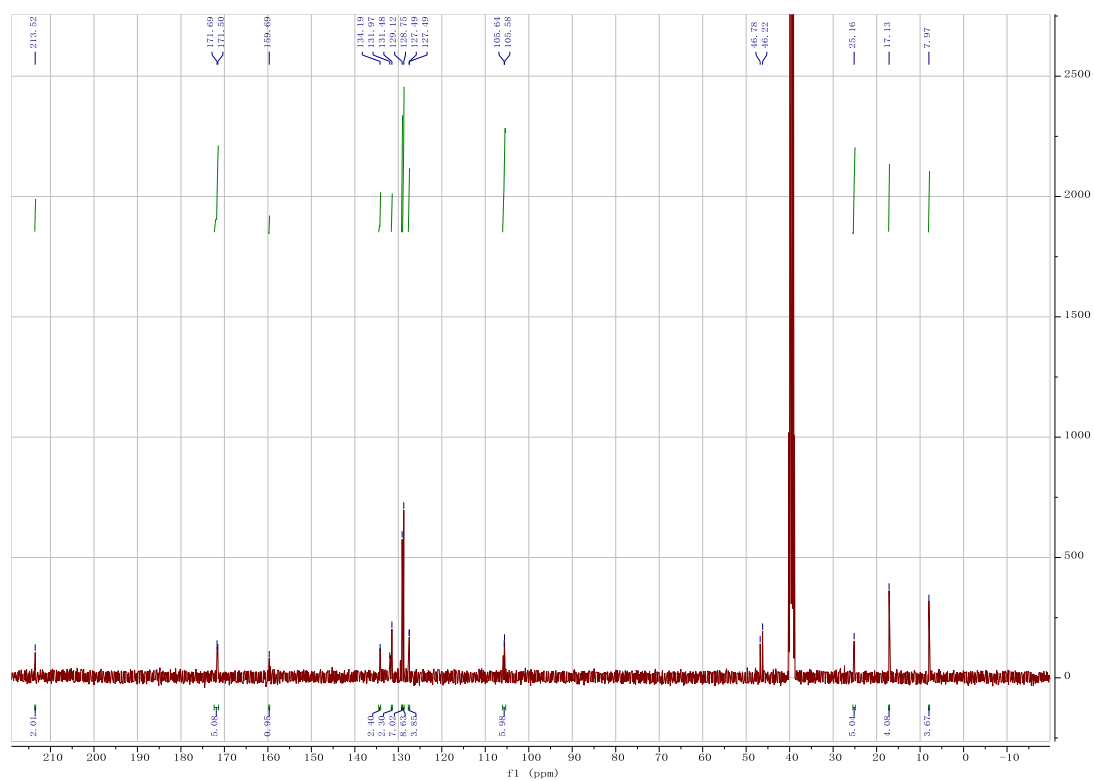

**Figure S2.** <sup>13</sup>C NMR (100 MHz, DMSO-*d*<sub>6</sub>) spectrum of compound **1**

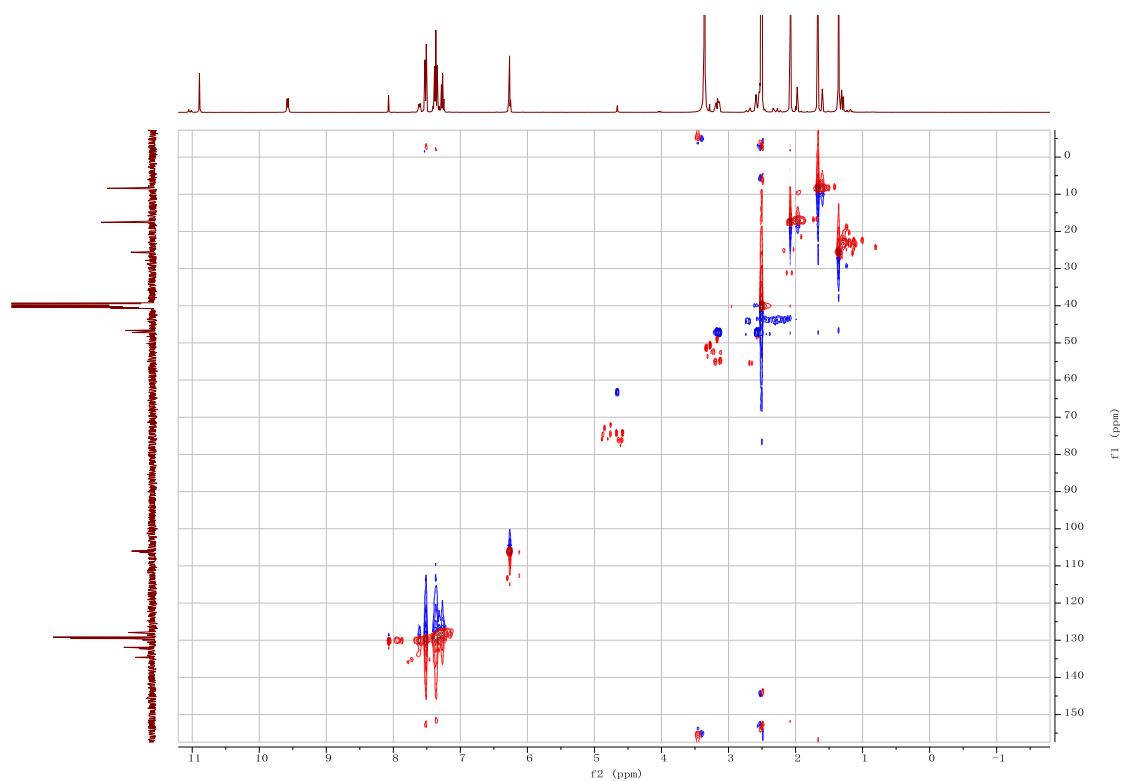

**Figure S3.** HMQC (400 MHz, DMSO- $d_6$ ) spectrum of compound **1**

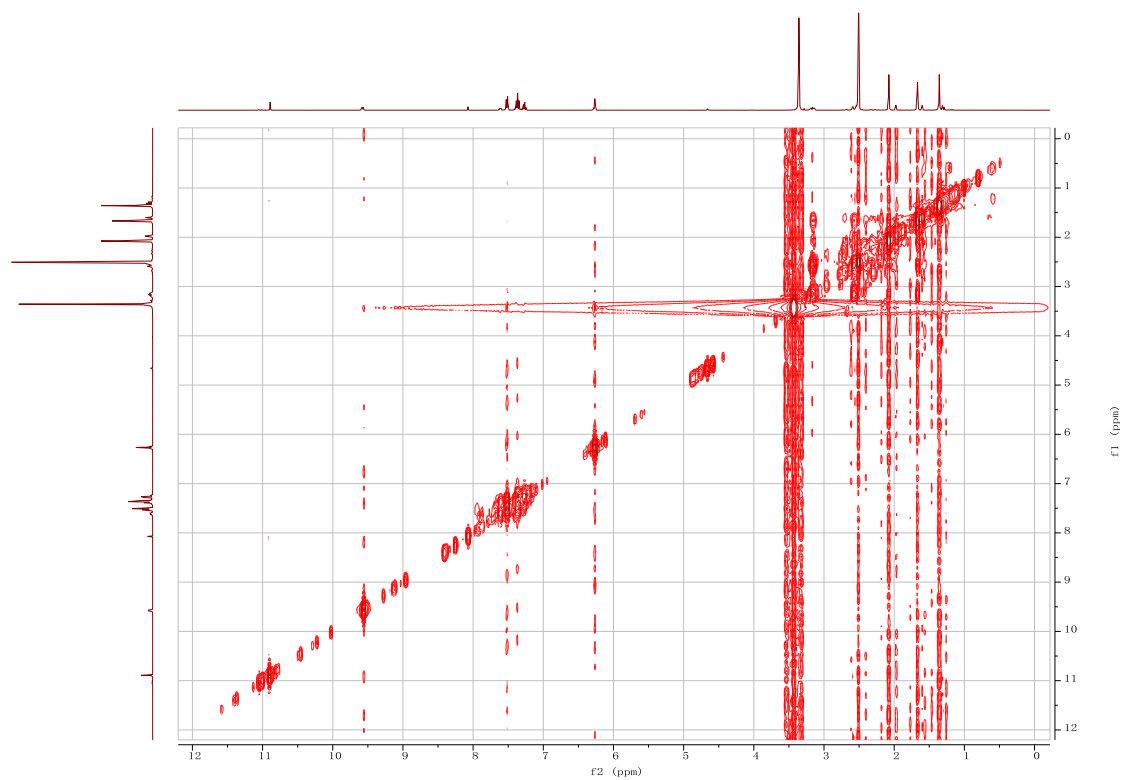

**Figure S4.**  $^1\text{H}$ - $^1\text{H}$  COSY (400 MHz, DMSO- $d_6$ ) spectrum of compound **1**

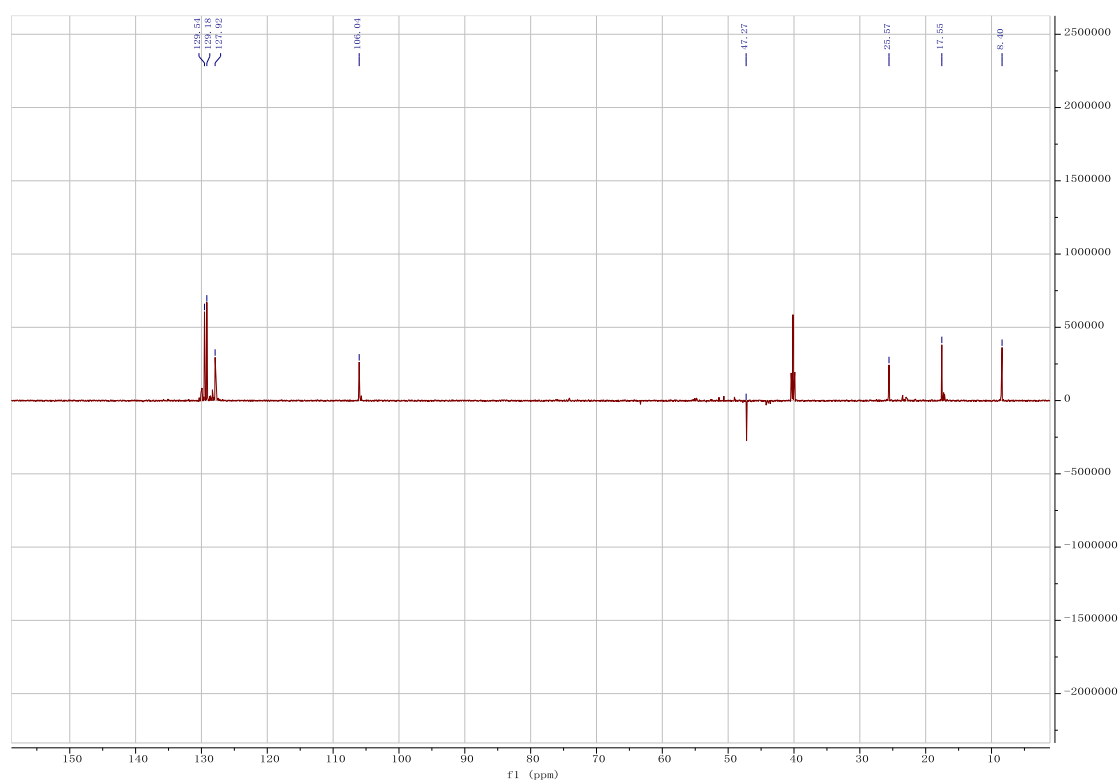

**Figure S5.** DEPT (400 MHz, DMSO- $d_6$ ) spectrum of compound **1**

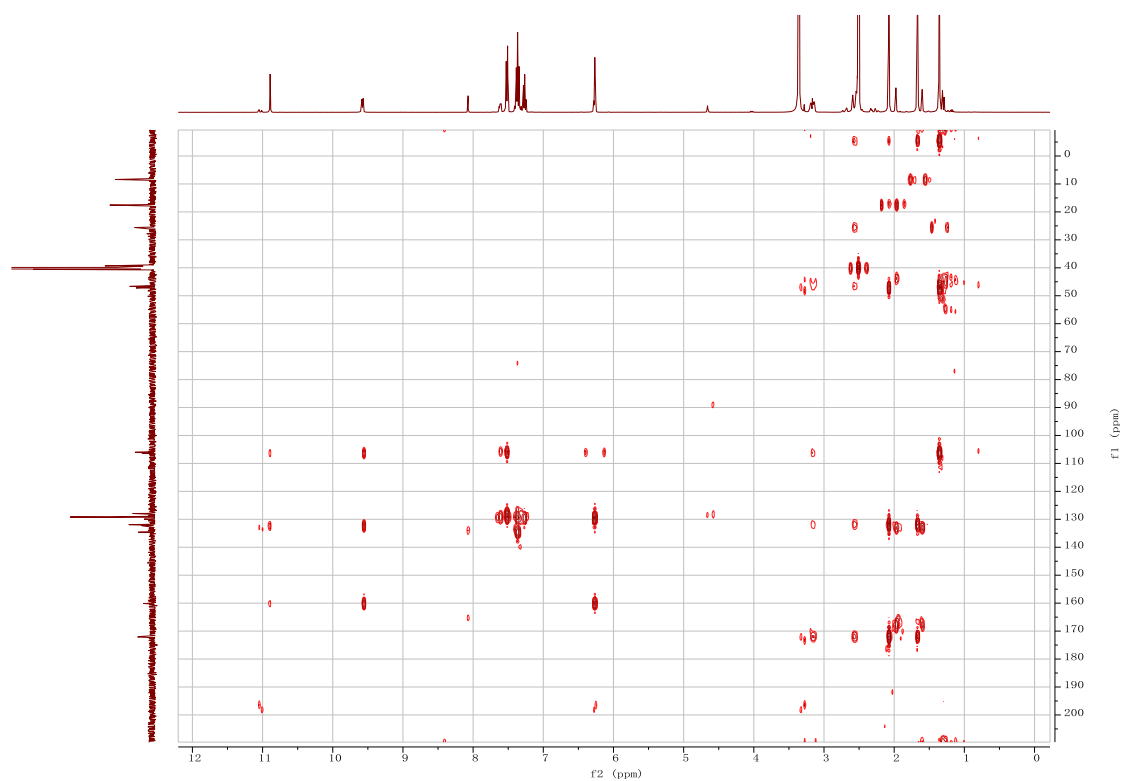

**Figure S6.** HMBC (400 MHz, DMSO- $d_6$ ) spectrum of compound **1**

|      |                         |      |       |        |                   |
|------|-------------------------|------|-------|--------|-------------------|
| 样品名称 | H1                      | 位置   | P1-A2 | 仪器名称   | Instrument 1      |
| 用户名称 |                         | 进样体积 | 0.5   | 进样位置   |                   |
| 样品类型 | Sample                  | 校准状态 | 成功    | 数据文件名称 | H2.d              |
| 采集方法 | 10-100%YAOJIAN-11-MIN.M | 注释   |       | 采集时间   | 2022/9/7 15:28:48 |

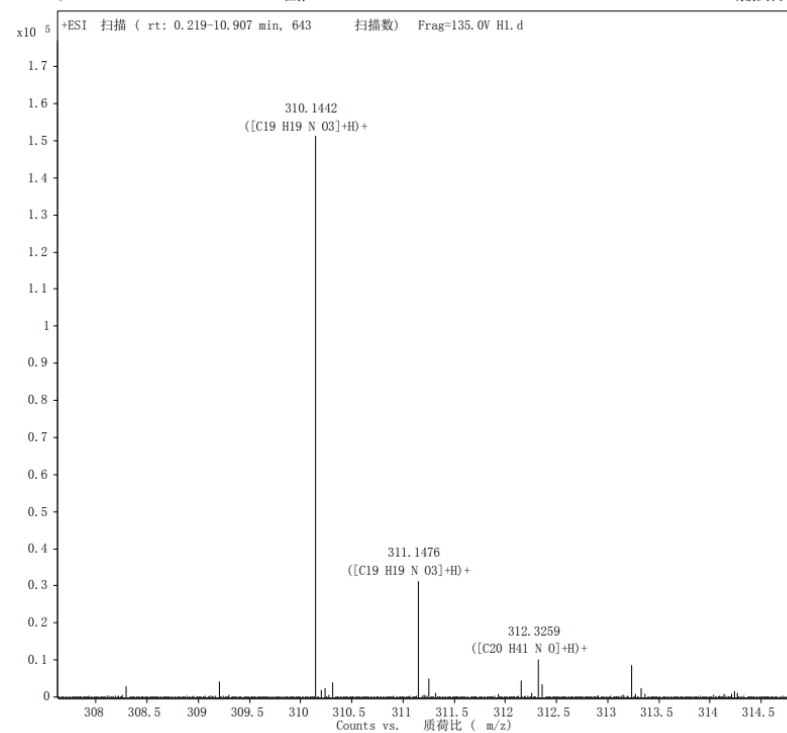

**Figure S7.** HR-ESI-MS spectrum of compound **1**

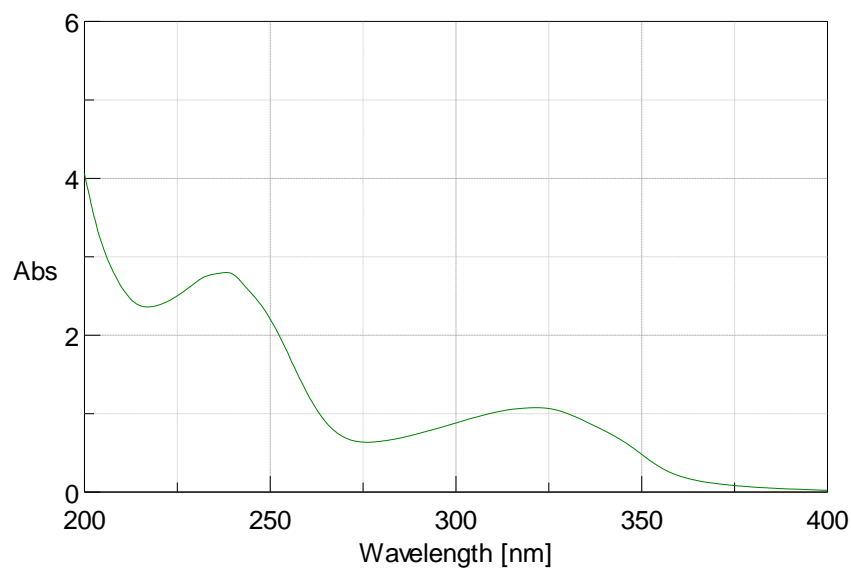

**Figure S8.** UV spectrum of compound **1**

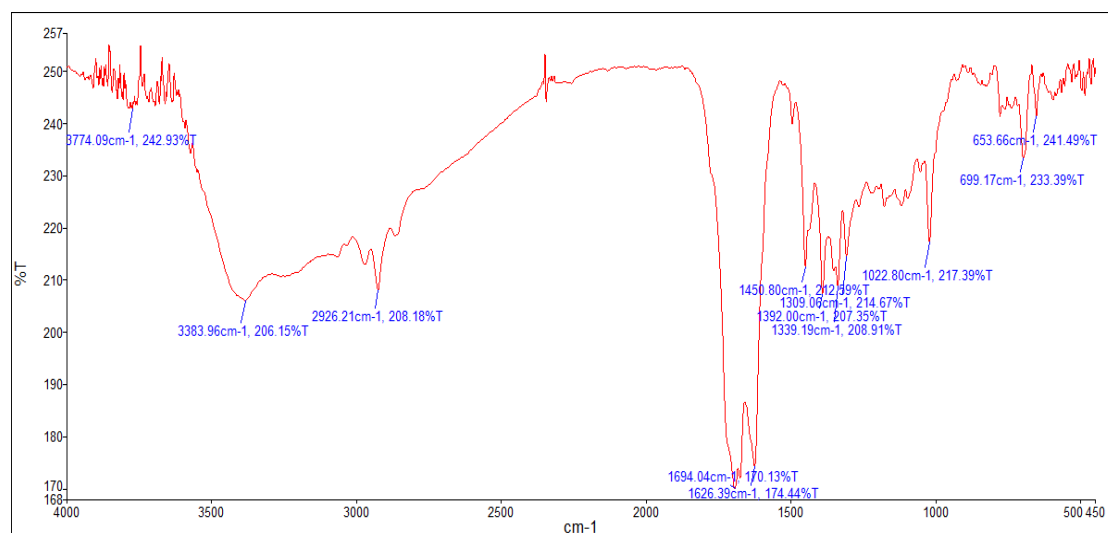

**Figure S9.** IR spectrum of compound **1**

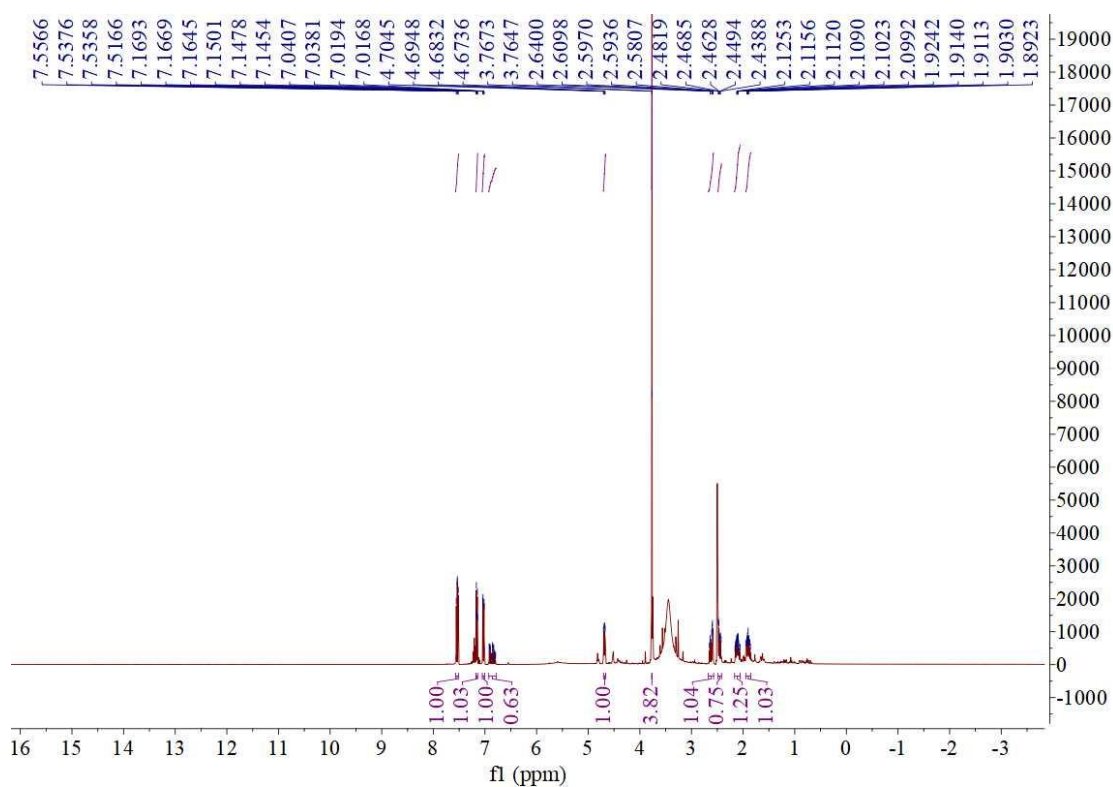

**Figure S10.**  $^1\text{H}$  NMR (400 MHz,  $\text{DMSO-}d_6$ ) spectrum of compound **2**

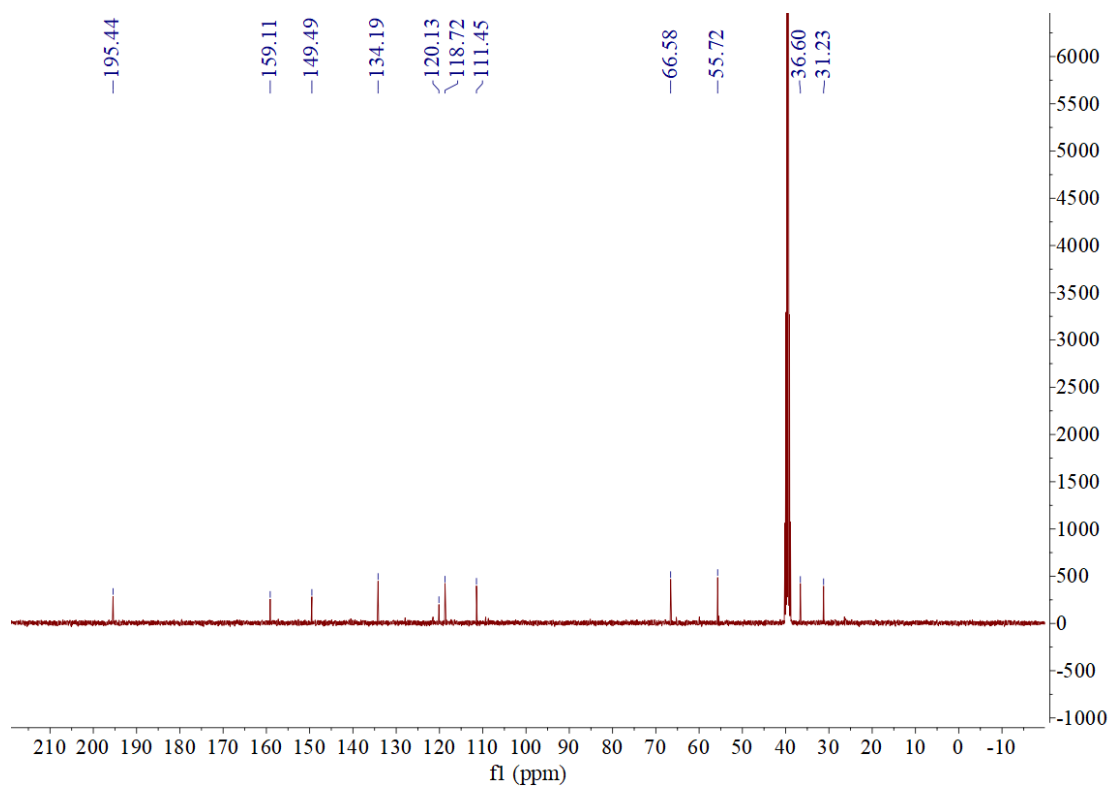

**Figure S11.**  $^{13}\text{C}$  NMR (100 MHz,  $\text{DMSO}-d_6$ ) spectrum of compound **2**

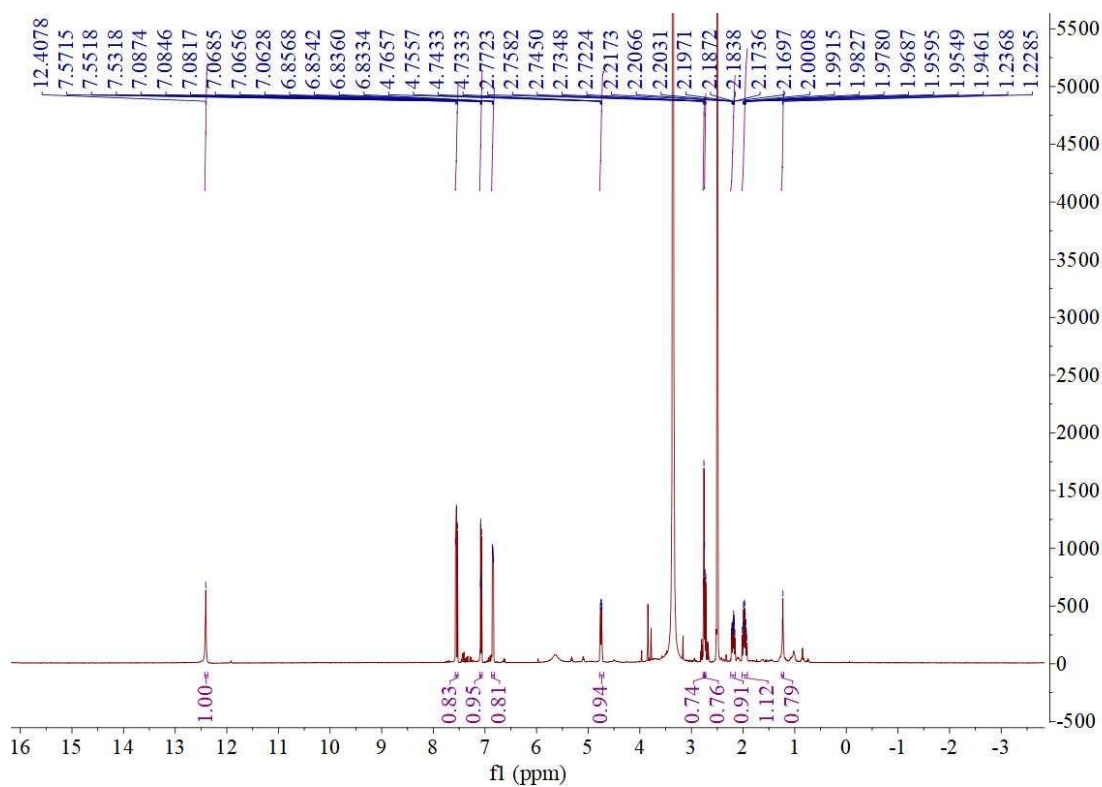

**Figure S12.**  $^1\text{H}$  NMR (400 MHz,  $\text{DMSO}-d_6$ ) spectrum of compound **3**



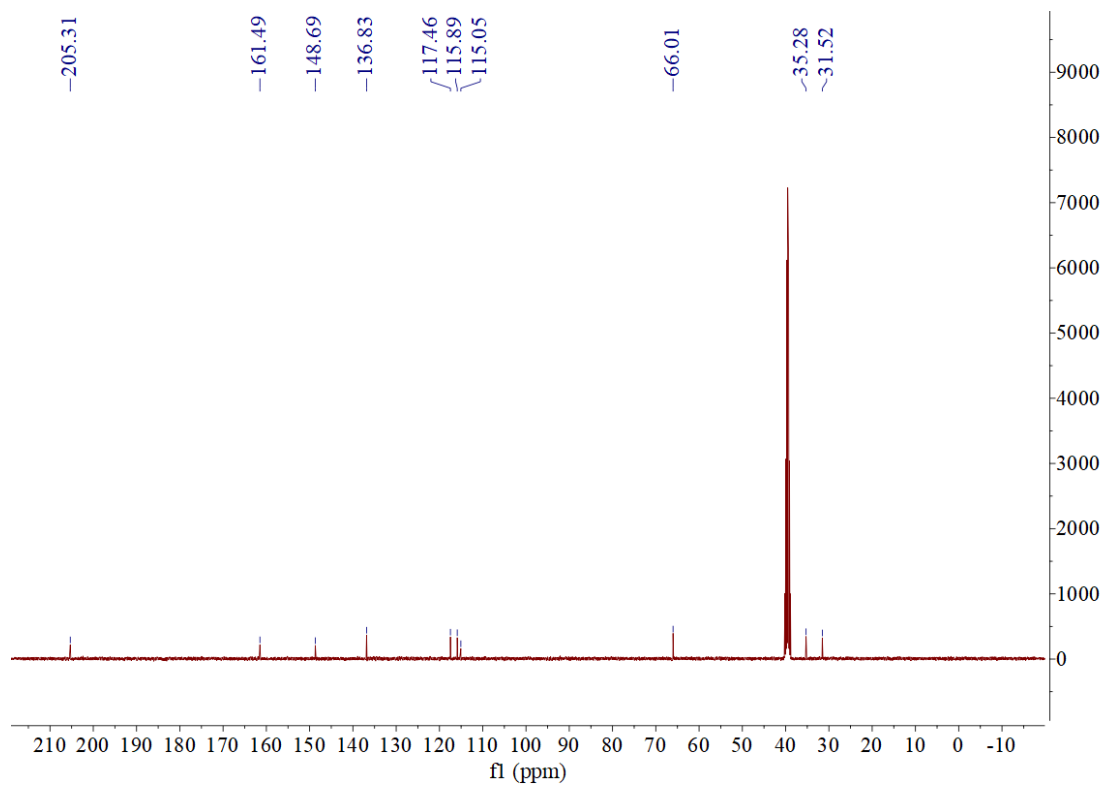

**Figure S13.**  $^{13}\text{C}$  NMR (100 MHz,  $\text{DMSO}-d_6$ ) spectrum of compound **3**

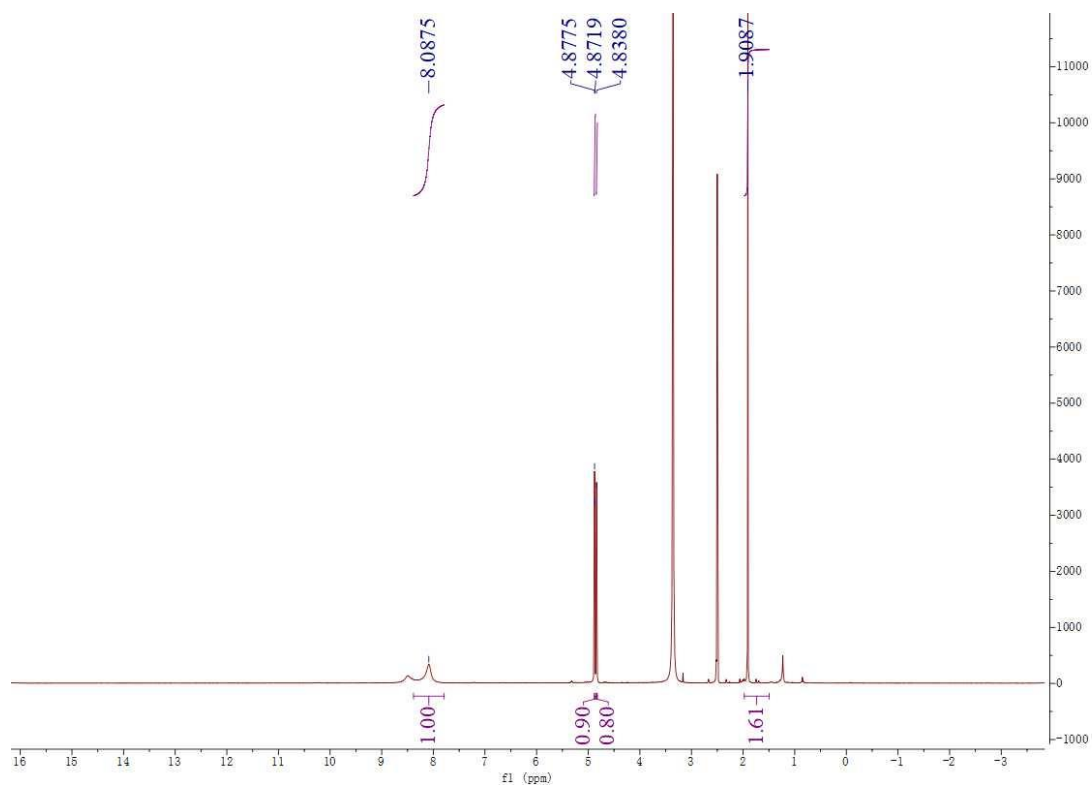

**Figure S14.**  $^1\text{H}$  NMR (400 MHz,  $\text{DMSO}-d_6$ ) spectrum of compound **4**

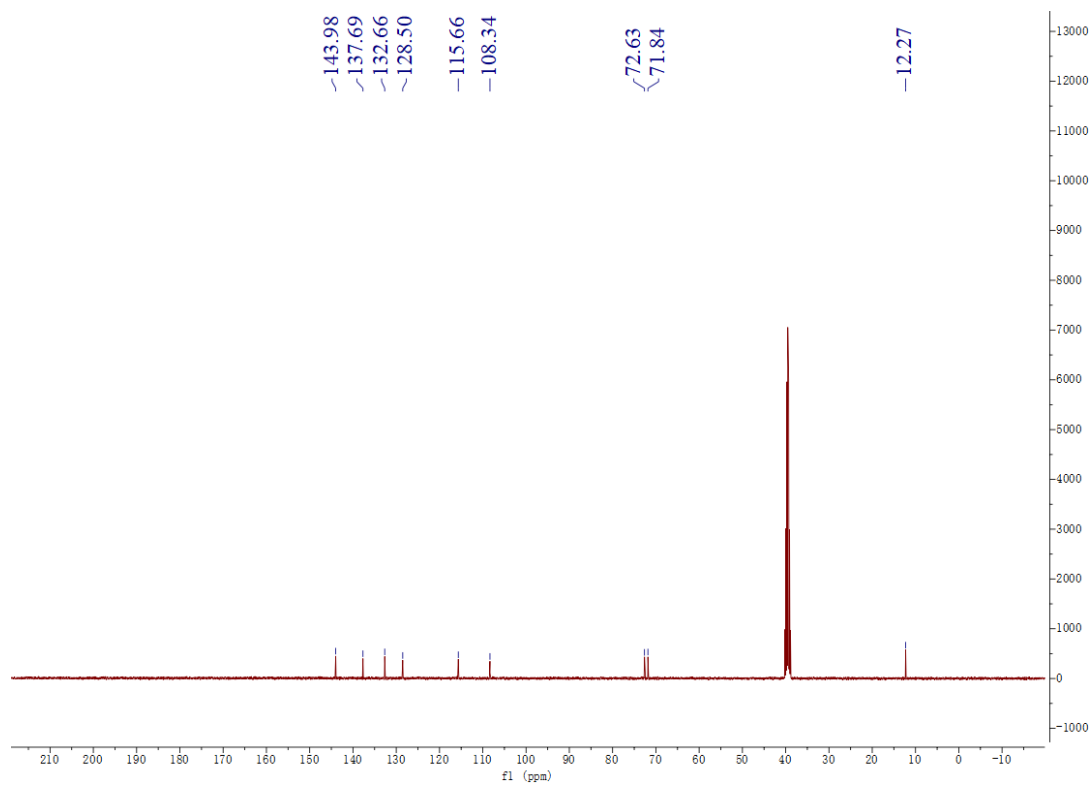

**Figure S15.** <sup>13</sup>C NMR (100 MHz, DMSO-*d*<sub>6</sub>) spectrum of compound **4**

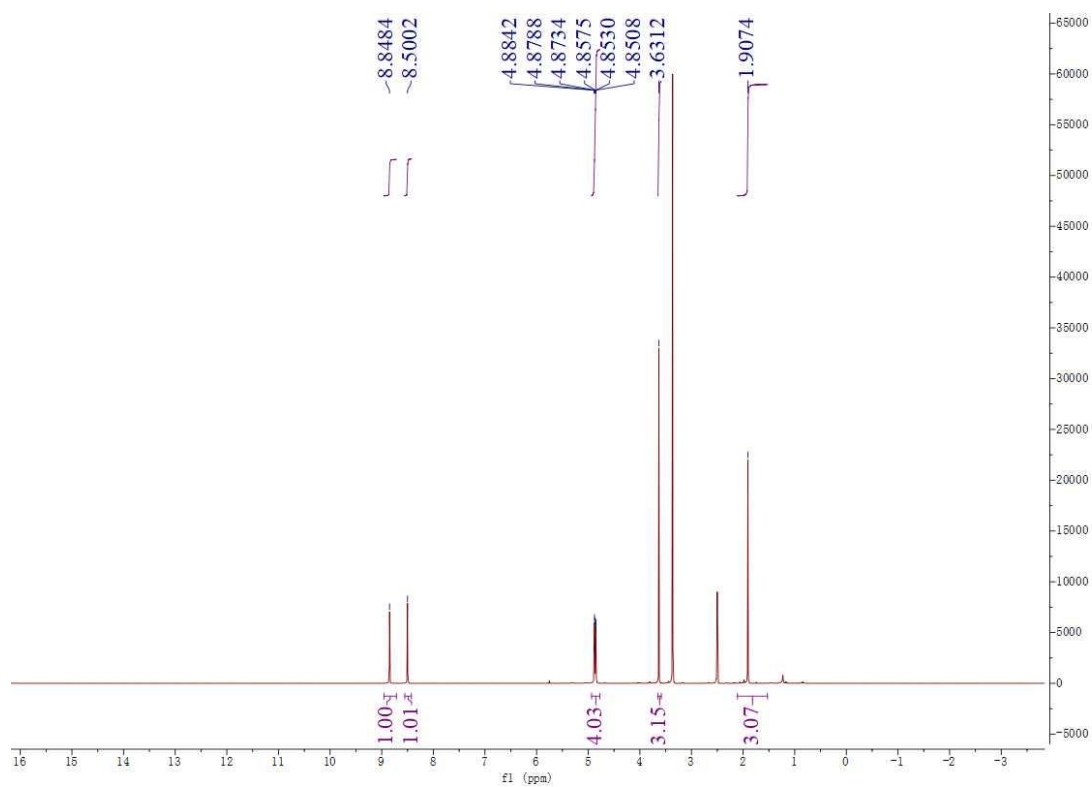

**Figure S16.** <sup>1</sup>H NMR (100 MHz, methanol-*d*<sub>4</sub>) spectrum of compound **5**

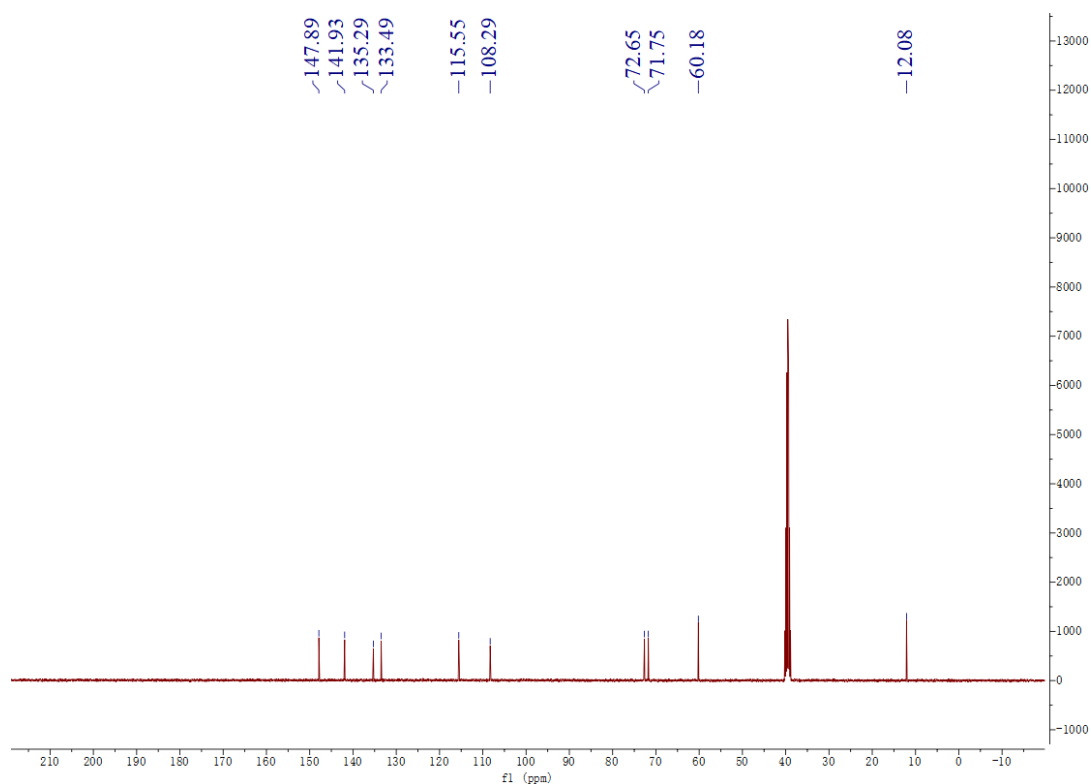

**Figure S17.**  $^{13}\text{C}$  NMR (100 MHz, methanol- $d_4$ ) spectrum of compound **5**

**Table S1 Crystal data and structure refinement for **1****

|                                       |                                                     |
|---------------------------------------|-----------------------------------------------------|
| Identification code                   | 1                                                   |
| Empirical formula                     | $\text{C}_{76}\text{H}_{76}\text{N}_4\text{O}_{12}$ |
| Formula weight                        | 1229.34                                             |
| Temperature/K                         | 103(6)                                              |
| Crystal system                        | monoclinic                                          |
| Space group                           | $\text{P2}_1/\text{c}$                              |
| $a/\text{\AA}$                        | 9.54190(10)                                         |
| $b/\text{\AA}$                        | 14.6110(3)                                          |
| $c/\text{\AA}$                        | 11.6889(2)                                          |
| $\alpha/^\circ$                       | 90                                                  |
| $\beta/^\circ$                        | 103.786(2)                                          |
| $\gamma/^\circ$                       | 90                                                  |
| Volume/ $\text{\AA}^3$                | 1582.68(5)                                          |
| $Z$                                   | 1                                                   |
| $\rho_{\text{calc}}/\text{g cm}^{-3}$ | 1.290                                               |
| $\mu/\text{mm}^{-1}$                  | 0.709                                               |
| $F(000)$                              | 648.0                                               |
| Crystal size/ $\text{mm}^3$           | ? $\times$ ? $\times$ ?                             |

|                                                  |                                                                       |
|--------------------------------------------------|-----------------------------------------------------------------------|
| Radiation                                        | CuK $\alpha$ ( $\lambda$ = 1.54184)                                   |
| 2 $\Theta$ range for data collection/ $^{\circ}$ | 9.544 to 151.32                                                       |
| Index ranges                                     | -11 $\leq$ h $\leq$ 11, -16 $\leq$ k $\leq$ 17, -14 $\leq$ l $\leq$ 8 |
| Reflections collected                            | 10965                                                                 |
| Independent reflections                          | 3116 [ $R_{\text{int}}$ = 0.0274, $R_{\text{sigma}}$ = 0.0238]        |
| Data/restraints/parameters                       | 3116/0/212                                                            |
| Goodness-of-fit on $F^2$                         | 1.078                                                                 |
| Final R indexes [ $I \geq 2\sigma(I)$ ]          | $R_1$ = 0.0381, $wR_2$ = 0.0979                                       |
| Final R indexes [all data]                       | $R_1$ = 0.0406, $wR_2$ = 0.0995                                       |
| Largest diff. peak/hole / e $\text{\AA}^{-3}$    | 0.24/-0.24                                                            |

**Table S2 Fractional Atomic Coordinates ( $\times 10^4$ ) and Equivalent Isotropic Displacement Parameters ( $\text{\AA}^2 \times 10^3$ ) for compound 1.  $U_{\text{eq}}$  is defined as 1/3 of the trace of the orthogonalised  $U_{\text{IJ}}$  tensor.**

| Atom   | <i>x</i>   | <i>y</i>  | <i>z</i>   | $U(\text{eq})$ |
|--------|------------|-----------|------------|----------------|
| O(001) | 8433.1(10) | 5541.9(6) | 4238.0(7)  | 19.3(2)        |
| O(002) | 4942.4(10) | 6092.1(6) | 667.3(8)   | 24.9(2)        |
| O(003) | 8192.7(10) | 7255.0(6) | 4731.4(8)  | 23.4(2)        |
| N(004) | 6495.8(11) | 4902.9(7) | 1387.7(9)  | 17.8(2)        |
| C(005) | 8568.3(13) | 3158.5(8) | 2076.5(11) | 16.1(3)        |
| C(006) | 7589.0(13) | 5545.2(8) | 3148.6(10) | 14.9(2)        |
| C(007) | 5930.7(13) | 5764.7(8) | 1435.4(10) | 17.2(3)        |
| C(008) | 7567.8(13) | 4725.3(8) | 2409.4(10) | 15.0(2)        |
| C(009) | 6686.7(13) | 6193.0(8) | 2553.6(10) | 14.7(2)        |
| C(00A) | 7469.8(13) | 7614.0(9) | 3829.2(10) | 17.0(3)        |
| C(00B) | 6286.2(13) | 7131.8(8) | 2908.5(10) | 15.7(3)        |
| C(00C) | 8460.1(13) | 4007.6(8) | 2713.3(10) | 16.6(3)        |
| C(00D) | 7987.9(13) | 3040.9(9) | 867.5(11)  | 18.4(3)        |
| C(00E) | 7534.9(14) | 8574.1(9) | 3509.9(11) | 19.7(3)        |
| C(00F) | 8031.3(14) | 2195.2(9) | 345.4(11)  | 21.1(3)        |

|        |            |            |            |         |
|--------|------------|------------|------------|---------|
| C(00G) | 6675.5(15) | 8706.4(9)  | 2429.9(11) | 20.8(3) |
| C(00H) | 9269.8(14) | 2408.7(9)  | 2723.3(11) | 19.5(3) |
| C(00I) | 4976.0(14) | 7058.6(9)  | 3463.9(12) | 22.5(3) |
| C(00J) | 8666.6(14) | 1449.4(9)  | 998.9(12)  | 22.3(3) |
| C(00K) | 5974.3(15) | 7833.8(9)  | 1894.8(11) | 21.4(3) |
| C(00L) | 9306.7(14) | 1563.9(9)  | 2189.7(12) | 22.2(3) |
| C(00M) | 8477.6(16) | 9242.1(10) | 4314.5(13) | 29.5(3) |
| C(00N) | 6392.9(19) | 9578.3(10) | 1752.2(14) | 32.3(3) |

**Table S3 Anisotropic Displacement Parameters ( $\text{\AA}^2 \times 10^3$ ) for compound 1. The Anisotropic displacement factor exponent takes the form:  $-2\pi^2[h^2a^{*2}U_{11}+2hka^*b^*U_{12}+\dots]$ .**

| Atom   | U <sub>11</sub> | U <sub>22</sub> | U <sub>33</sub> | U <sub>23</sub> | U <sub>13</sub> | U <sub>12</sub> |
|--------|-----------------|-----------------|-----------------|-----------------|-----------------|-----------------|
| O(001) | 25.7(5)         | 18.1(4)         | 10.9(4)         | -1.7(3)         | -2.2(3)         | -0.2(4)         |
| O(002) | 29.8(5)         | 20.0(5)         | 17.9(5)         | -5.1(3)         | -8.2(4)         | 5.7(4)          |
| O(003) | 26.5(5)         | 24.0(5)         | 15.9(4)         | -6.3(4)         | -2.7(4)         | 2.1(4)          |
| N(004) | 23.0(5)         | 15.5(5)         | 12.2(5)         | -3.6(4)         | -1.4(4)         | 1.6(4)          |
| C(005) | 14.8(6)         | 17.0(6)         | 17.1(6)         | -0.5(5)         | 5.2(4)          | -1.4(4)         |
| C(006) | 16.2(5)         | 17.3(6)         | 10.9(5)         | -0.6(4)         | 2.3(4)          | -3.9(4)         |
| C(007) | 20.0(6)         | 15.8(6)         | 14.2(6)         | -2.0(5)         | 0.8(5)          | -0.5(5)         |
| C(008) | 17.6(6)         | 15.7(6)         | 11.2(5)         | -0.5(4)         | 2.6(4)          | -3.0(4)         |
| C(009) | 17.9(6)         | 14.8(6)         | 11.2(5)         | -2.1(4)         | 2.7(4)          | -2.0(4)         |
| C(00A) | 17.1(6)         | 19.2(6)         | 14.9(6)         | -5.6(5)         | 4.3(5)          | 0.7(5)          |
| C(00B) | 17.9(6)         | 15.4(6)         | 12.7(5)         | -2.3(4)         | 1.4(4)          | -0.2(5)         |
| C(00C) | 18.0(6)         | 18.0(6)         | 12.7(5)         | 0.8(4)          | 1.8(4)          | -1.9(5)         |
| C(00D) | 17.6(6)         | 21.9(6)         | 16.3(6)         | 1.5(5)          | 5.0(5)          | 1.9(5)          |
| C(00E) | 19.9(6)         | 17.9(6)         | 23.0(6)         | -7.0(5)         | 8.5(5)          | -1.6(5)         |
| C(00F) | 18.9(6)         | 28.4(7)         | 16.8(6)         | -5.5(5)         | 5.8(5)          | -1.1(5)         |
| C(00G) | 26.8(7)         | 15.4(6)         | 22.3(6)         | -2.5(5)         | 10.2(5)         | 0.0(5)          |
| C(00H) | 20.2(6)         | 22.5(7)         | 15.5(6)         | 0.4(5)          | 3.3(5)          | 1.5(5)          |
| C(00I) | 20.5(6)         | 21.8(7)         | 26.1(7)         | -5.9(5)         | 7.6(5)          | -1.5(5)         |
| C(00J) | 23.2(6)         | 19.8(6)         | 26.4(7)         | -7.7(5)         | 11.1(5)         | -2.7(5)         |
| C(00K) | 30.0(7)         | 15.7(6)         | 16.2(6)         | -1.1(5)         | 1.0(5)          | -0.5(5)         |
| C(00L) | 24.5(7)         | 18.3(6)         | 25.3(7)         | 1.8(5)          | 8.6(5)          | 3.3(5)          |
| C(00M) | 28.0(7)         | 23.7(7)         | 36.0(8)         | -13.6(6)        | 6.1(6)          | -5.5(6)         |
| C(00N) | 48.7(9)         | 17.5(7)         | 32.3(8)         | 1.6(6)          | 12.9(7)         | -0.8(6)         |

**Table S4 Bond Lengths for compound 1.**

| Atom   | Atom   | Length/Å   | Atom   | Atom   | Length/Å   |
|--------|--------|------------|--------|--------|------------|
| O(001) | C(006) | 1.3348(14) | C(00A) | C(00B) | 1.5332(16) |
| O(002) | C(007) | 1.2332(15) | C(00A) | C(00E) | 1.4568(18) |
| O(003) | C(00A) | 1.2313(16) | C(00B) | C(00I) | 1.5436(17) |
| N(004) | C(007) | 1.3761(16) | C(00B) | C(00K) | 1.5416(17) |
| N(004) | C(008) | 1.3992(15) | C(00D) | C(00F) | 1.3831(18) |
| C(005) | C(00C) | 1.4631(17) | C(00E) | C(00G) | 1.3455(19) |
| C(005) | C(00D) | 1.4002(17) | C(00E) | C(00M) | 1.4976(18) |
| C(005) | C(00H) | 1.4066(17) | C(00F) | C(00J) | 1.3849(19) |
| C(006) | C(008) | 1.4743(16) | C(00G) | C(00K) | 1.5051(17) |
| C(006) | C(009) | 1.3548(17) | C(00G) | C(00N) | 1.4903(19) |
| C(007) | C(009) | 1.4734(16) | C(00H) | C(00L) | 1.3872(18) |
| C(008) | C(00C) | 1.3441(17) | C(00J) | C(00L) | 1.3905(19) |
| C(009) | C(00B) | 1.5085(16) |        |        |            |

**Table S5 Bond Angles for compound 1.**

| Atom   | Atom   | Atom   | Angle/°    | Atom   | Atom   | Atom   | Angle/°    |
|--------|--------|--------|------------|--------|--------|--------|------------|
| C(007) | N(004) | C(008) | 110.43(10) | C(009) | C(00B) | C(00A) | 114.73(10) |
| C(00D) | C(005) | C(00C) | 123.96(11) | C(009) | C(00B) | C(00I) | 109.65(10) |
| C(00D) | C(005) | C(00H) | 118.03(11) | C(009) | C(00B) | C(00K) | 114.13(10) |
| C(00H) | C(005) | C(00C) | 117.99(11) | C(00A) | C(00B) | C(00I) | 105.76(10) |
| O(001) | C(006) | C(008) | 118.49(10) | C(00A) | C(00B) | C(00K) | 102.05(10) |
| O(001) | C(006) | C(009) | 131.11(11) | C(00K) | C(00B) | C(00I) | 110.00(10) |
| C(009) | C(006) | C(008) | 110.39(10) | C(008) | C(00C) | C(005) | 130.11(11) |
| O(002) | C(007) | N(004) | 124.38(11) | C(00F) | C(00D) | C(005) | 120.58(12) |
| O(002) | C(007) | C(009) | 127.51(11) | C(00A) | C(00E) | C(00M) | 121.51(12) |
| N(004) | C(007) | C(009) | 108.10(10) | C(00G) | C(00E) | C(00A) | 108.97(11) |
| N(004) | C(008) | C(006) | 104.75(10) | C(00G) | C(00E) | C(00M) | 129.50(13) |
| C(00C) | C(008) | N(004) | 131.18(11) | C(00D) | C(00F) | C(00J) | 120.98(12) |
| C(00C) | C(008) | C(006) | 124.03(11) | C(00E) | C(00G) | C(00K) | 112.30(11) |
| C(006) | C(009) | C(007) | 106.00(10) | C(00E) | C(00G) | C(00N) | 127.89(12) |
| C(006) | C(009) | C(00B) | 131.74(11) | C(00N) | C(00G) | C(00K) | 119.80(12) |
| C(007) | C(009) | C(00B) | 121.85(10) | C(00L) | C(00H) | C(005) | 120.74(12) |
| O(003) | C(00A) | C(00B) | 125.04(11) | C(00F) | C(00J) | C(00L) | 119.18(12) |
| O(003) | C(00A) | C(00E) | 125.46(11) | C(00G) | C(00K) | C(00B) | 105.00(10) |
| C(00E) | C(00A) | C(00B) | 109.38(10) | C(00H) | C(00L) | C(00J) | 120.33(12) |

**Table S6 Hydrogen Atom Coordinates ( $\text{\AA}\times 10^4$ ) and Isotropic Displacement Parameters ( $\text{\AA}^2\times 10^3$ ) for compound 1.**

| Atom   | <i>x</i> | <i>y</i> | <i>z</i> | U(eq) |
|--------|----------|----------|----------|-------|
| H(001) | 8390     | 6042     | 4546     | 29    |
| H(004) | 6228     | 4527     | 811      | 21    |
| H(00C) | 9110     | 4059     | 3442     | 20    |
| H(00D) | 7570     | 3536     | 411      | 22    |
| H(00F) | 7628     | 2126     | -457     | 25    |
| H(00H) | 9714     | 2480     | 3518     | 23    |
| H(00A) | 4163     | 6821     | 2892     | 34    |
| H(00B) | 4745     | 7654     | 3714     | 34    |
| H(00E) | 5205     | 6655     | 4131     | 34    |
| H(00J) | 8665     | 879      | 646      | 27    |
| H(00G) | 6386     | 7634     | 1254     | 26    |
| H(00I) | 4943     | 7918     | 1596     | 26    |
| H(00L) | 9762     | 1072     | 2631     | 27    |
| H(00K) | 8328     | 9182     | 5094     | 44    |
| H(00M) | 8239     | 9853     | 4034     | 44    |
| H(00N) | 9471     | 9120     | 4331     | 44    |
| H(00O) | 6883     | 10072    | 2226     | 48    |
| H(00P) | 5374     | 9698     | 1546     | 48    |
| H(00Q) | 6739     | 9527     | 1048     | 48    |

## Experimental

Single crystals of  $\text{C}_{76}\text{H}_{76}\text{N}_4\text{O}_{12}$  [20220623-HXS-H1] were [ ]. A suitable crystal was selected and [ ] on a **XtaLAB Synergy, Dualflex, HyPix** diffractometer. The crystal was kept at 103(6) K during data collection. Using Olex2, the structure was solved with the ShelXT structure solution program using Intrinsic Phasing and refined with the ShelXL refinement package using Least Squares minimisation.

## Crystal structure determination of [20220623-HXS-H1]

**Crystal Data** for  $\text{C}_{76}\text{H}_{76}\text{N}_4\text{O}_{12}$  ( $M=1229.34$  g/mol): monoclinic, space group  $P2_1/c$  (no. 14),  $a = 9.54190(10)$  Å,  $b = 14.6110(3)$  Å,  $c = 11.6889(2)$  Å,  $\beta = 103.786(2)^\circ$ ,  $V = 1582.68(5)$  Å<sup>3</sup>,  $Z = 1$ ,  $T = 103(6)$  K,  $\mu(\text{CuK}\alpha) = 0.709$  mm<sup>-1</sup>,  $D_{\text{calc}} = 1.290$  g/cm<sup>3</sup>, 10965 reflections measured ( $9.544^\circ \leq 2\theta \leq 151.32^\circ$ ), 3116 unique ( $R_{\text{int}} = 0.0274$ ,  $R_{\text{sigma}} = 0.0238$ ) which were used in all calculations. The final  $R_1$  was 0.0381 ( $I > 2\sigma(I)$ ) and  $wR_2$  was 0.0995 (all data).

## Refinement model description

Number of restraints - 0, number of constraints - unknown.

Details:

1. Fixed Uiso

At 1.2 times of:

All C(H) groups, All C(H,H) groups, All N(H) groups

At 1.5 times of:

All C(H,H,H) groups, All O(H) groups

2.a Secondary CH<sub>2</sub> refined with riding coordinates:

C00K(H00G,H00I)

2.b Aromatic/amide H refined with riding coordinates:

N004(H004), C00C(H00C), C00D(H00D), C00F(H00F), C00H(H00H), C00J(H00J),  
C00L(H00L)

2.c Idealised Me refined as rotating group:

C00I(H00A,H00B,H00E), C00M(H00K,H00M,H00N), C00N(H00O,H00P,H00Q)

2.d Idealised tetrahedral OH refined as rotating group:

O001(H001)

This report has been created with Olex2, compiled on 2018.05.29 svn.r3508 for OlexSys. Please [let us know](#) if there are any errors or if you would like to have additional features.
